# Supplementary material
Source: PubMed Central journal article supplement (PMC1976579)

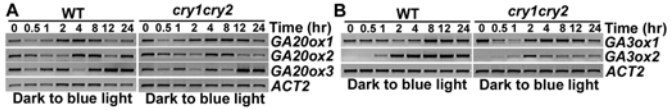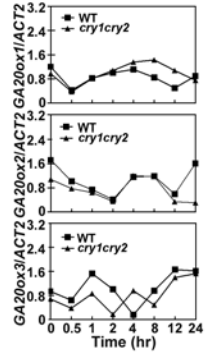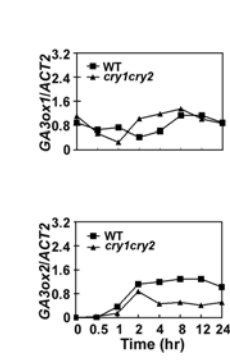

Supplement: plntphys_pp.107.099838_1.pdf [file plntphys_pp.107.099838_1.pdf]

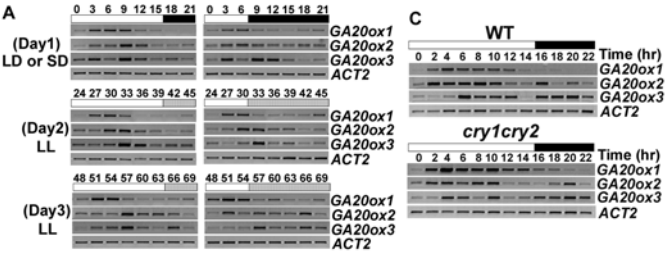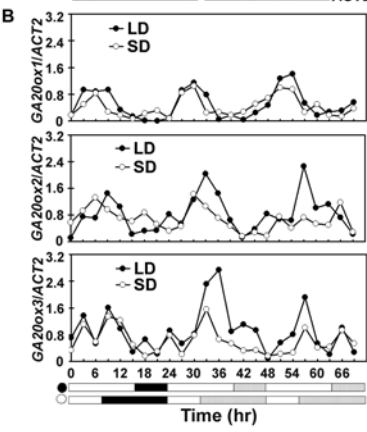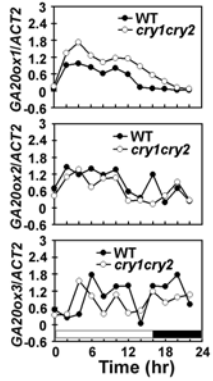

Supplement: plntphys_pp.107.099838_2.pdf [file plntphys_pp.107.099838_2.pdf]
